# Supplementary material
Source: PubMed Central journal article supplement (PMC8820242)
Supplement: NIHMS1771873-supplement-Supplementary_Material.pdf [file NIHMS1771873-supplement-Supplementary_Material.pdf]

# Supplementary Material

## Diagnosing Mild Cognitive Impairment Among Racially Diverse Older Adults: Comparison of Consensus, Actuarial, and Statistical Methods

**Supplementary Table 1.** Latent Class Analysis of Cognitive Function at Baseline (N = 354)

| Classes | Parameters | AIC  | CAIC | BIC  | aBIC | Entropy | -2LL   | VLMR <i>p</i> | BLRT <i>p</i> |
|---------|------------|------|------|------|------|---------|--------|---------------|---------------|
| 1       | 12         | 5846 | 5905 | 5893 | 5855 | —       | —      | —             | —             |
| 2       | 19         | 5414 | 5506 | 5487 | 5427 | 0.86    | 446.67 | <0.0001       | <0.0001       |
| 3       | 26         | 5309 | 5436 | 5410 | 5327 | 0.85    | 118.59 | 0.0077        | <0.0001       |
| 4       | 33         | 5238 | 5399 | 5366 | 5261 | 0.85    | 85.22  | 0.5452        | <0.0001       |
| 5       | 40         | 5157 | 5352 | 5312 | 5185 | 0.81    | 94.71  | 0.6306        | <0.0001       |
| 6       | 47         | 5106 | 5335 | 5288 | 5139 | 0.83    | 64.91  | 0.0273        | <0.0001       |
| 7       | 54         | 5069 | 5332 | 5278 | 5107 | 0.85    | 51.12  | 0.1908        | <0.0001       |

AIC, Akaike Information Criterion; CAIC, consistent AIC; BIC, Bayesian Information Criterion; aBIC, sample size-adjusted BIC; -2LL, twice the log-likelihood difference; VLMR, Vuong-Lo-Mendell-Rubin likelihood ratio test; BLRT, bootstrap likelihood ratio test

**Supplementary Table 2.** Cross-Tabulation of Latent Classes with Consensus and Actuarial MCI Subtypes at Baseline

|                            | Latent Class |            |             |                  |                   |
|----------------------------|--------------|------------|-------------|------------------|-------------------|
|                            | High Normal  | Low Normal | Memory Only | Memory/ Language | Memory/ Executive |
| <b>Consensus Diagnosis</b> |              |            |             |                  |                   |
| NC                         | 103          | 84         | 11          | 1                | 0                 |
| MCI (Total)                | 6            | 17         | 57          | 46               | 29                |
| aMCI-SD                    | 4            | 3          | 31          | 20               | 4                 |
| aMCI-MD                    | 0            | 6          | 20          | 26               | 24                |
| naMCI                      | 2            | 8          | 6           | 0                | 1                 |
| <b>Actuarial Diagnosis</b> |              |            |             |                  |                   |
| NC                         | 103          | 58         | 4           | 0                | 0                 |
| MCI (Total)                | 6            | 43         | 64          | 47               | 29                |
| aMCI-SD                    | 2            | 4          | 45          | 25               | 3                 |
| aMCI-MD                    | 0            | 5          | 16          | 22               | 26                |
| naMCI                      | 4            | 34         | 3           | 0                | 0                 |

NC, normal cognition; aMCI, amnesic mild cognitive impairment; naMCI, non-amnesic mild cognitive impairment; SD, single domain; MD, multi-domain
